# Supplementary material
Source: publisher site journal article supplement (https://www.degruyterbrill.com/publication/isbn/9783110971811/downloadAsset/9783110971811_Inhaltsverzeichnis.pdf)
Supplement: Supplementary file 1 [file 9783110971811_Inhaltsverzeichnis.pdf]

## Inhaltsverzeichnis

| Nr.                                                                                                                                                | Seite |
|----------------------------------------------------------------------------------------------------------------------------------------------------|-------|
| 1 Asylbegehren armenisch-orthodoxer Christen aus Istanbul. Niedersächsisches OVG, Urteil vom 3.7.2003 (11 LB 1/03) .....                           | 1     |
| 2 Verbot religiöser Werbung im Rundfunk. EGMR, Urteil vom 10.7.2003 (No. 44179/98 [Murphy ./ Irland]) .....                                        | 19    |
| 3 Private islamische Bekenntnisgrundschule. VG Stuttgart, Urteil vom 11.7.2003 (10 K 1794/01) .....                                                | 44    |
| 4 Berücksichtigung pauschalierter Kirchensteuer beim Arbeitslosengeld. LSG Baden-Württemberg, Urteil vom 15.7.2003 (L 13 AL 4869/02) .....         | 66    |
| 5 Befreiung von der allgemeinen Schulbesuchspflicht aus religiösen Gründen. BayVGH, Beschluss vom 15.7.2003 (7 ZB 03.1368) .....                   | 69    |
| 6 Ausnahmegenehmigung für das Schächten. OVG Nordrhein-Westfalen, Urteil vom 16.7.2003 (20 A 1108/03) .....                                        | 73    |
| 7 Vornamensänderung aus religiösen Gründen. VG Augsburg, Urteil vom 17.7.2003 (AU 1 K 02.774) .....                                                | 85    |
| 8 Keine Mietzinsminderung wegen Madonnenstatue im Treppenhaus eines Mehrfamilienhauses. AG Münster, Urteil vom 22.7.2003 (3 C 2122/03) .....       | 90    |
| 9 Unfallversicherungsschutz für Pfarrgemeinderatsmitglied beim Pfarrfest. LSG Nordrhein-Westfalen, Urteil vom 23.7.2003 (L 17 U 216/02) .          | 91    |
| 10 Saalmiete bei kath. Kirchengemeinde. AG Neuss, Urteil vom 25.7.2003 (77/32 C 6064/02) .....                                                     | 100   |
| 11 Einbeziehung eines fiktiven Kirchensteuerhebesatzes in die Berechnung von Altersteilzeitentgelt. BAG, Urteil vom 29.7.2003 (9 AZR 450/02) ..... | 104   |
| 12 Kündigung einer muslimischen Verkäuferin wegen Tragens eines Kopftuchs. BVerfG, Nichtannahmebeschluss vom 30.7.2003 (1 BvR 792/03) .....        | 110   |
| 13 Feiertagsrechtlicher Schutz von Karfreitag und Karsamstag. VG München, Urteil vom 31.7.2003 (M 4 K 03.2208) .....                               | 116   |
| 14 Abzug/Anrechnung von Kirchensteuer bei Kirchensteuerfestsetzung. FG München, Urteil vom 1.8.2003 (10 K 1670/03) .....                           | 121   |

|    |                                                                                                                                                                     |     |
|----|---------------------------------------------------------------------------------------------------------------------------------------------------------------------|-----|
| 15 | Berücksichtigung fiktiver Kirchensteuer bei der Bemessung des Alters-<br>teilsteuerschlags im öff. Dienst. VG München, Urteil vom 7.8.2003<br>(M 5 K 02.2301) ..... | 124 |
| 16 | Befangenheit eines Richters. VerfG Brandenburg, Beschluss vom<br>21.8.2003 (VfGBbg 196/03) .....                                                                    | 128 |
| 17 | Eingruppierung einer Krankenhauseelsorgehelferin im kirchlichen<br>Dienst. BAG, Urteil vom 27.8.2003 (4 AZR 519/02) .....                                           | 131 |
| 18 | Aufwendungen für Pfarrdienstwohnung als Werbungskosten. Nieders.<br>FG, Urteil vom 28.8.2003 (16 K 2/02) .....                                                      | 139 |
| 19 | Einreiseverbot für Oberhaupt einer Religionsgemeinschaft. BVerwG,<br>Beschluss vom 4.9.2003 (1 B 288/02) .....                                                      | 141 |
| 20 | Unfallversicherungsschutz für Versammlungsältesten der Zeugen<br>Jehovas. LSG Baden-Württemberg, Urteil vom 11.9.2003 (L 7 U<br>2955/01) .....                      | 147 |
| 21 | Befreiung von der Schulbesuchspflicht aus religiösen Gründen. VG<br>Augsburg, Urteil vom 23.9.2003 (9 K 03.600) .....                                               | 158 |
| 22 | Kopftuchverbot für muslimische Lehrerin im öff. Schuldienst. BVerfG,<br>Urteil vom 24.9.2003 (2 BvR 1436/02) .....                                                  | 166 |
| 23 | Schließung einer sorbischen Mittelschule. Sächsisches OVG, Beschluss<br>vom 24.9.2003 (2 BS 273/03) .....                                                           | 204 |
| 24 | Information über Religionsgemeinschaft. OVG Berlin, Urteil vom<br>25.9.2003 (5 B 26.00) .....                                                                       | 207 |
| 25 | Kreuz im Sitzungssaal. VG Darmstadt, Urteil v. 26.9.2003 (3 E 2482/<br>02(1)) .....                                                                                 | 223 |
| 26 | Zulassung zum Studium an kirchl. Fachhochschule. VG Osnabrück,<br>Beschluss vom 1.10.2003 (3 C 5/03) .....                                                          | 228 |
| 27 | Förderung von kath. Schwangerenberatungsstellen. OVG Nordrhein-<br>Westfalen, Urteil vom 2.10.2003 (21 A 1144/02) .....                                             | 231 |
| 28 | Tischgebet im Kindergarten. BVerfG, Nichtannahmebeschluss vom<br>2.10.2003 (1 BvR 1522/03) .....                                                                    | 243 |
| 29 | Verbot des Vereins „Kalifatsstaat“. BVerfG, Nichtannahmebeschluss<br>vom 2.10.2003 (1 BvR 536/03) .....                                                             | 247 |
| 30 | Befreiung von der Schulbesuchspflicht aus religiösen Gründen.<br>BVerwG, Beschluss vom 7.10.2003 (6 B 41/03) .....                                                  | 252 |

|    |                                                                                                                                                                             |     |
|----|-----------------------------------------------------------------------------------------------------------------------------------------------------------------------------|-----|
| 31 | Steuerpflicht von Messstipendien. Nieders. FG, Urteil vom 10.10.2003 (11 K 191/03) .....                                                                                    | 257 |
| 32 | Kirchengesetzliche Grundlage für Kirchensteuererhebung. Schleswig-Holsteinisches OVG, Beschluss vom 13.10.2003 (2 LA 44/03) .....                                           | 260 |
| 33 | Kosten einer Erstkommunionfeier als sonstiger Unterhaltsbedarf. AG Aachen, Urteil vom 17.10.2003 -21 F 203/02) .....                                                        | 267 |
| 34 | Umbenennung der Kirchenumlage von Kirchensteuer in Bekenntnissteuer. FG München, Urteil vom 24.10.2003 (10 K 602/03) .....                                                  | 269 |
| 35 | Verfassungsmäßigkeit von § 8 Abs.1 Satz 1 Satz 2 BayKiStG. BFH, Beschluss vom 29.10.2003 (I B 8/03) .....                                                                   | 270 |
| 36 | Förderung von kath. Schwangerenberatungsstellen. Niedersächsisches OVG, Urteil vom 30.10.2003 (11 LC 18/03) .....                                                           | 274 |
| 37 | Klostername als Marke. BPatG, Beschluss vom 5.11.2003 (26 W [pat] 185/99 [Zinnaer Abtei]) .....                                                                             | 289 |
| 38 | Kündigung eines Gruppenleiters in einer Behindertenwerkstatt der Diakonie wegen Kirchenaustritts. LAG Brandenburg, Urteil vom 13.11.2003 (2 Sa 410/03) .....                | 293 |
| 39 | Geldleistungen an schwerbehinderten Geistlichen für begleitende Hilfe im Arbeits- und Berufsleben. BVerwG, Urteil vom 14.11.2003 (5 C 13/02) .....                          | 302 |
| 40 | Islamischer Religionsunterricht. OVG Nordrhein-Westfalen, Urteil vom 2.12.2003 (19 A 997/02) .....                                                                          | 307 |
| 41 | Passfoto einer zum Christentum konvertierten Muslima. OVG Nordrhein-Westfalen, Beschluss vom 3.12.2003 (18 B 2410/02) .....                                                 | 333 |
| 42 | Mitgliedschaft in Moschee-Verein. VG München, Urteil vom 4.12.2003 (M 24 K 02.1878) .....                                                                                   | 335 |
| 43 | Abänderung kirchengesetzlicher Regelungen über die Erhebung von Kirchgeld, Rechtsnatur und Vertrauensschutz. OVG Niedersachsen, Beschluss vom 8.12.2003 (3 ME 298/03) ..... | 344 |
| 44 | Steuerliche Berücksichtigung des häuslichen Arbeitszimmers eines Regionalkantors. FG Rheinland-Pfalz, Urteil vom 8.12.2003 (5 K 2299/03) .....                              | 349 |
| 45 | Nicht-sakrales Zeitschlagen der kommunalen Kirchturmuhre. BayVGH, Beschluss vom 9.12.2003 (22 ZB 03.3011) .....                                                             | 360 |
| 46 | Zuwendungen an Stiftungen als pflichtteilsergänzungspflichtige Schenkungen. BGH, Urteil vom 10.12.2003 (IV ZR 249/02) .....                                                 | 367 |

|    |                                                                                                                                   |     |
|----|-----------------------------------------------------------------------------------------------------------------------------------|-----|
| 47 | Relig. Sendungsbewusstsein als Eignungsmangel eines Offiziersbewerbers. BVerwG, Beschluss vom 11.12.2003 (1 WB 24/03) . . . . .   | 374 |
| 48 | Entziehung der Rechtsfähigkeit eines Vereins. VGH Baden-Württemberg, Urteil vom 12.12.2003 (1 S 1972/00) . . . . .                | 378 |
| 49 | Befreiung von der Schulbesuchspflicht aus religiösen Gründen. OVG Sachsen-Anhalt, Beschluss vom 16.12.2003 (2 L 239/01) . . . . . | 406 |
| 50 | Befreiung von der Schulbesuchspflicht aus religiösen Gründen. VG Braunschweig, Urteil vom 17.12.2003 (6 A 568/02) . . . . .       | 411 |
